# Supplementary material
Source: PubMed Central journal article supplement (PMC2805730)
Supplement: 2009.011536_1.pdf [file 2009.011536_1.pdf]

---

# **TFG, a target of chromosome translocations in lymphoma and soft tissue tumors, fuses to *GPR128* in healthy individuals**

Andrew Chase,<sup>1,2</sup> Thomas Ernst,<sup>1,2</sup> Andreas Fiebig,<sup>3,4</sup> Andrew Collins,<sup>2</sup> Francis Grand,<sup>1,2</sup> Philipp Erben,<sup>5</sup> Andreas Reiter,<sup>5</sup> Stefan Schreiber,<sup>4</sup> and Nicholas CP Cross<sup>1,2</sup>

<sup>1</sup>Wessex Regional Genetics Laboratory, Salisbury, UK; <sup>2</sup>Human Genetics Division, University of Southampton, UK; <sup>3</sup>Biobank PopGen, Institute for Experimental Medicine, Section Epidemiology, Christian-Albrechts-University, Kiel, Germany; <sup>4</sup>III. Medizinische Universitätsklinik, Medizinische Fakultät Mannheim der Universität Heidelberg, Mannheim, Germany

*Citation: Chase A, Ernst T, Fiebig A, Collins A, Grand F, Erben P, Reiter A, Schreiber S and NCP Cross. TFG, a target of chromosome translocations in lymphoma and soft tissue tumours, fuses to GPR128 in healthy individuals. Haematologica 2009; XXX doi:10.3324/haematol.2009.011536*

©2010 Ferrata Storti Foundation. This is an open-access paper.

---

Online supplementary Tables 1-3, refers to corresponding [pdf\\_haematol.2009.010876.Supplementary Tables.pdf](#)

©Ferrata Storti Foundation

**Supplementary Table 1** Primers used for PCR amplification

| <b>Amplification of TFG-GPR128 from cDNA</b>                                     |                            |
|----------------------------------------------------------------------------------|----------------------------|
| TFG.1F                                                                           | ATGAACGGACAGTTGGATCTAA     |
| GPR128.3R                                                                        | AAGTAAAACCCATATAGGTACTAT   |
| <b>Amplification Refractory Mutation System (ARMS) PCR from genomic DNA</b>      |                            |
| TFG.genF                                                                         | CCACAGCCTACCTGTGAGTG       |
| GPR128.genF                                                                      | GCAGGCTTTCCTTCTTGAGG       |
| GPR.genR                                                                         | TGGGTTTTGTTTGTGGAAAT       |
| <b>Amplification of microsatellite TG repeat at chr3:101,840,545-101,840,591</b> |                            |
| TFG-GPR.MS1F                                                                     | GCACACTTGTCAAAACCCTTT      |
| TFG-GPR.MS1R                                                                     | [6FAM]TCCAGTTGCTGAGCAGAGAA |
| <b>SNP genotyping within CNV</b>                                                 |                            |
| PCR within CNV:                                                                  |                            |
| GPR.SNPc1F                                                                       | TAATCATGAAATTTTCCTGTGGAA   |
| GPR.SNPc1R                                                                       | CTCAAGGGATCCTTCTGCCA       |
| <b>PCR across CNV breakpoint</b>                                                 |                            |
| TFG.genF                                                                         | see above                  |
| GPR.SNPc1R                                                                       | see above                  |

**Supplementary Table 2** Phenotype data on ten individuals with the *TFG-GPR128* fusion gene and 737 controls

| Disease phenotype           | <i>TFG-GPR</i><br>positive (N=10) | Controls<br>(N=737) |
|-----------------------------|-----------------------------------|---------------------|
| median DOB (range)          | 1941 (1933-1951)                  | 1942 (1928-1957)    |
| heart attack                | 1/10                              |                     |
| dilated cardiomyopathy      | 0/10                              |                     |
| blood pressure              | 4/10                              |                     |
| varicose veins              | 2/10                              |                     |
| thromboses                  | 0/10                              |                     |
| respiratory                 | 2/10                              |                     |
| gallstones                  | 1/10                              |                     |
| cholecystectomy             | 1/10                              |                     |
| coloscopy                   | 6/10                              | 392/737 (53.2%)     |
| irritable bowel<br>syndrome | 0/10                              |                     |
| pyrosis                     | 2/10                              |                     |
| stomach ulcer               | 0/10                              |                     |
| diabetes                    | 0/10                              |                     |

|                                          |      |               |
|------------------------------------------|------|---------------|
| blood values                             | 1/10 |               |
| psoriasis                                | 1/10 |               |
| neuropathy                               | 5/10 | 110/737 (15%) |
| cancer                                   | 1/10 |               |
| glaucoma                                 | 0/10 |               |
| hearing loss                             | 2/10 |               |
| parodontitis                             | 1/9  |               |
| heart murmur                             | 1/10 |               |
| electrocardiogram<br>abnormality         | 3/7  |               |
| peripheral arterial<br>occlusive disease | 0/10 |               |
| arthrosis                                | 2/10 |               |
| chronic obstructive<br>pulmonary disease | 0/10 |               |
| asthma                                   | 0/10 |               |

©Ferrata Storti Foundation

**Supplementary Table 3: Reconstructed haplotypes with ten or more copies (total=539) for region chr3:101729831- 101982055 (UCSC Hg18).** The haplotype containing the *TFG-GPR128* CNV is indicated in bold.

| Haplotype                                                                        | Count      |
|----------------------------------------------------------------------------------|------------|
| CCAAAAAAGAACCGTACTCTGTCTAGTCCTACGCAACGGAGCCTTTTCGAGTAACCCTCGATCGCCCGCCCG         | 30         |
| CCAAAAAAGAACCGTACTCCACCTGACCCTACGCAGCCATATCTTCTAAGTGCCCTCCCGGCTACTCGTCCG         | 14         |
| CCAAAAAAGAACCGTACTCCACCTGACCCTACGCAGCGATACCCTTTAGGCACTTCCCGGTGCTCGTCCG           | 221        |
| CCAAAAAAGAACCGTACTCCACCTGACCCTACGCAACCATATCTTCTAAGTGCCCTCCCGGCTGCTCGTCCG         | 10         |
| <b>CCAAAAAAGAACCGTACTCCACCTGACCCTACGCAACCATATCTTCTAAGTGCCCTCCCGGCTGGTTCGTGAA</b> | <b>105</b> |
| CCAAAAAAGAACCGTACTCCACCTGACCCTACGCAACCATATCTTCTAAGTGCCCTCCCGGCTACTCGTCCG         | 111        |
| TCAGGGTGAGATTATACTCTGTCTGGTCCTACGCAACGGAGCCTTTTCGAGTAACTCTCGGCTGGTTCGTGAA        | 10         |
| TCAGGGTGAGATTATACTCTGTCTAGTCCTACGCAACGGAGCCTTTTCGAGTAACTCCCGGTGCTCGTCCG          | 16         |
| TCAGGGTGAGATTATACTCTGTCTAGTCCTACGCAACGGAGCCTTTTCGAGTAACTCTCGATCGCCCGCCCG         | 194        |
| TCAGGGTGAGATTATACTCTGTCTAGTCCTACGCAACGGAGCCTTTTCGAGTAAACCCTCGATCGCCCGCCCG        | 33         |
| TCCGGGGTGAGATTATACTCTGTCTAGTCCTACGCAACGGAGCCTTTTCGAGTAAACCCTCGATCGCCCGCCCG       | 14         |
| TCCGGGGTGAGACTACGCTCCACCCGACACTACGGGACGATACCCTTTTAGGCACTTCCCGGTGCTCGTCCG         | 45         |
| TCCGGGGTGAGCCTACGCTCCACCTGACCCTACGCAACCATATCTTCTAAGTGCCCTCCCGGCTACTCGTCCG        | 42         |
| TCCGGGGTGAGCCTACGCTCCACCTGACCCTACGCAACCATATCTTCTAAGTGCCCTCCCGATCGCCCGCCCG        | 11         |
| TTAAAAAAGAACCGTACTCCACCTGACCCTACGCAACCATATCTTCTAAGTGCCCTCCCGGCTGCTCGTCCG         | 13         |

**Affymetrix SNP 6.0 SNP identities for region chr3: 101729831- 101982055:**

rs6777810, rs7627378, rs4928110, rs6799882, rs6799882, rs6799992, rs7433589, rs11719592, rs4928112, rs6441329, rs4928066, rs9864288, rs7429915, rs11923487, rs9290097, rs10511187, rs9832463, rs1305377, rs9867401, rs1620897, rs1144126, rs1144125, rs1145350, rs10936276, rs10755119, rs1144122, rs4928070, rs16842463, rs1145343, rs1145342, rs1145340, rs16842481, rs9872753, rs2246355, rs1680508, rs4928072, rs1680499, rs1165536, rs4928081, rs7617579, rs7627660, rs6775789, rs1300266, rs4928083, rs1143777, rs6810101, rs1144107, rs1144106, rs1520649, rs1144104, rs3773921, rs41373752, rs2126540, rs1048364, rs905604, rs9817424, rs1143774, rs9823506, rs9290213, rs560803, rs7642041, rs7628413, rs544500, rs7642643, rs900234, rs9814717, rs16842822, rs6441552, rs9873555, rs7613610, rs9850273
